# Supplementary material for: Effect of Music Therapy on Parent-Infant Bonding Among Infants Born Preterm: A Randomized Clinical Trial
Source: PubMed Central journal article supplement (PMC10220519; doi:10.1001/jamanetworkopen.2023.15750), 2023-05-26
Supplement: jamanetwopen-e2315750-s002.pdf [file jamanetwopen-e2315750-s002.pdf]

## Supplemental Online Content

Ghetti CM, Gaden TS, Bieleninik Ł, et al. Effect of music therapy on parent-infant bonding among infants born preterm: a randomized clinical trial. *JAMA Netw Open*. 2023;6(5):e2315750. doi:10.1001/jamanetworkopen.2023.15750

**eTable 1.** Amendments to the Published Study Protocol

**eTable 2.** Music Therapy Intervention Descriptives

**eTable 3.** LME Results for Primary Outcome and Secondary Parental Well-being Outcomes

**eTable 4.** Subgroup Analysis for the Primary Outcome

**eFigure 1.** Risk for Rehospitalization

**eTable 5.** Severe Adverse Events

**eAppendix.** Description of Primary Outcome Variable

This supplemental material has been provided by the authors to give readers additional information about their work.

**eTable 1. Amendments to the published study protocol**

| <b>Domain</b>                                                   | <b>Original wording</b>                                                                                     | <b>Revised to</b>                                                                                                                                                                                                                                                                                                                                                                                                                                                                                                                                              | <b>Rationale</b>                                                                                                                                                                                                                                                                  |
|-----------------------------------------------------------------|-------------------------------------------------------------------------------------------------------------|----------------------------------------------------------------------------------------------------------------------------------------------------------------------------------------------------------------------------------------------------------------------------------------------------------------------------------------------------------------------------------------------------------------------------------------------------------------------------------------------------------------------------------------------------------------|-----------------------------------------------------------------------------------------------------------------------------------------------------------------------------------------------------------------------------------------------------------------------------------|
| Delineation of “PBQ at baseline” sub-groups                     | “bonding at baseline (PBQ impaired bonding score $\geq 11$ vs $< 11$ )”                                     | “bonding at baseline (PBQ impaired bonding score $> 11$ vs $\leq 11$ )”<br><br>[Date of change 1 January 2020]                                                                                                                                                                                                                                                                                                                                                                                                                                                 | To correct a typographical error                                                                                                                                                                                                                                                  |
| Implementation of intervention: MT post-discharge from hospital | “[MT post-discharge sessions]...will occur at home, municipal child health centres or follow-up clinics...” | Addition: “If in-person visits are not possible due to restrictions accompanying the COVID-19 pandemic, MT sessions post-discharge will be offered via videocalls. Procedures for the videocalls will follow the steps provided in the original protocol, with the exception that the music therapist will generally listen and observe when the parent is singing, instead of singing or providing musical accompaniment. Sites should return to offering in-person sessions, once that option becomes available again.”<br><br>[Date of change 1 April 2020] | Social isolation restrictions related to the COVID-19 pandemic impacted all participating sites and precluded use of in-person MT sessions. On April 1, 2020, the study received approval from the overseeing ethics committee to incorporate procedures for virtual MT sessions. |

**eTable 2. Music therapy intervention descriptives**

| Variable                                  | MT in NICU |                                   | MT Post discharge |                                   |
|-------------------------------------------|------------|-----------------------------------|-------------------|-----------------------------------|
|                                           | <i>N</i>   | <i>n</i> (%)                      | <i>N</i>          | <i>n</i> (%)                      |
| Received per protocol MT                  | 105        | 87 (83)                           | 105               | 63 (60)                           |
| Received virtual MT sessions <sup>a</sup> | 105        | 0 (0)                             | 105               | 23 (22)                           |
|                                           | <i>N</i>   | <i>M</i> ( <i>SD</i> ) [min, max] | <i>N</i>          | <i>M</i> ( <i>SD</i> ) [min, max] |
| Total MT sessions                         | 105        | 9.98 (5.95) [0, 27]               | 105               | 4.73 (2.53) [0, 14 <sup>b</sup> ] |
| Session length                            | 105        | 32.84 (8.14) [0, 50]              | 92                | 43.65 (10.82) [0, 60]             |
| Mother present                            | 105        | 8.39 (6.01) [0, 27]               | 92                | 4.74 (2.4) [0, 14]                |
| Father present                            | 103        | 2.15 (3.39) [0, 20]               | 92                | 1.13 (1.82) [0, 7]                |
| Both parents present                      | 104        | 2.73 (3.69) [0, 18]               | 92                | 1.55 (1.98) [0, 7]                |
| Treatment delivery <sup>c</sup>           | 72         | 4.88 (0.92) [1, 6]                | 40                | 4.95 (1.05) [1, 6]                |

<sup>a</sup>Participants who received one or more MT sessions digitally due to restrictions related to the COVID-19 pandemic; total 52 MT sessions at 6 sites; 2.26 (1.09)[1, 4]

<sup>b</sup>This value represents a single exception where one participant received greater than protocol due to human error

<sup>c</sup>Mean composite treatment delivery scores for 39 randomly selected participants (high=6; with 4=sufficient adherence, determined *a priori*)

**eTable 3. LME results for primary outcome and secondary parental well-being outcomes**

|                                   | PBQ                 |         | GAD7 (Mother)        |         | GAD7 (Father)        |         | EPDS                 |         |
|-----------------------------------|---------------------|---------|----------------------|---------|----------------------|---------|----------------------|---------|
|                                   | B (95%CI)           | p-value | B (95%CI)            | p-value | B (95%CI)            | p-value | B (95%CI)            | p-value |
| Time effect                       |                     | 0.98    |                      | <0.001  |                      | <0.001  |                      | <0.001  |
| BL                                | 1                   |         | 1                    |         | 1                    |         | 1                    |         |
| 6 months                          | -0.52 (-3.6, 2.57)  |         | -3.18 (-4.81, -1.55) |         | -2.27 (-4, -0.54)    |         | -3.18 (-4.91, -1.45) |         |
| 12 months                         | -0.1 (-3.18, 2.98)  |         | -2.63 (-4.27, -0.99) |         | -1.86 (-3.68, -0.04) |         | -2.93 (-4.66, -1.2)  |         |
| Group differences                 |                     | 0.88    |                      | 0.08    |                      | 0.002   |                      | 0.020   |
| MT at NICU                        |                     |         |                      |         |                      |         |                      |         |
| Standard care                     | 1                   |         | 1                    |         | 1                    |         | 1                    |         |
| Music therapy                     | 2.3 (-0.68, 5.28)   |         | 1.26 (-0.32, 2.84)   |         | 1.47 (-0.19, 3.13)   |         | 2.82 (1.14, 4.49)    |         |
| MT after discharge                |                     |         |                      |         |                      |         |                      |         |
| Standard care                     | 1                   |         | 1                    |         | 1                    |         | 1                    |         |
| Music therapy                     | 0.54 (-2.45, 3.52)  |         | 2.26 (0.69, 3.83)    |         | 0.07 (-1.6, 1.74)    |         | 2.58 (0.92, 4.23)    |         |
| Group effect (2-way interactions) |                     | 0.34    |                      | 0.26    |                      | 0.87    |                      | 0.11    |
| Time * MT at NICU                 |                     |         |                      |         |                      |         |                      |         |
| 6 months * MT                     | -0.85 (-5.17, 3.47) |         | 0.26 (-2.03, 2.55)   |         | 0.17 (-2.26, 2.61)   |         | -1.17 (-3.6, 1.27)   |         |
| 12 months * MT                    | -1.45 (-5.78, 2.88) |         | -0.99 (-3.31, 1.32)  |         | -0.89 (-3.43, 1.65)  |         | -2.08 (-4.51, 0.36)  |         |
| Time * MT after discharge         |                     |         |                      |         |                      |         |                      |         |
| 6 months * MT                     | 0.67 (-3.62, 4.97)  |         | -1.68 (-3.95, 0.59)  |         | -0.02 (-2.48, 2.45)  |         | -0.72 (-3.12, 1.67)  |         |
| 12 months * MT                    | 1.21 (-3.13, 5.56)  |         | -1.62 (-3.92, 0.68)  |         | -0.36 (-2.89, 2.17)  |         | -1.84 (-4.26, 0.59)  |         |
| MT at NICU * MT after discharge   | -3.18 (-7.38, 1.02) |         | -1.98 (-4.19, 0.24)  |         | 0.33 (-2.03, 2.68)   |         | -4.08 (-6.42, -1.73) |         |
| 3-ways interactions               |                     | 0.86    |                      | 0.61    |                      | 0.95    |                      | 0.09    |
| 6 months * MT * MT                | 1.63 (-4.4, 7.66)   |         | 1 (-2.19, 4.19)      |         | -0.53 (-3.97, 2.91)  |         | 2.44 (-0.95, 5.82)   |         |
| 12 months * MT * MT               | 0.52 (-5.59, 6.62)  |         | 1.61 (-1.63, 4.85)   |         | -0.3 (-3.84, 3.23)   |         | 3.73 (0.32, 7.15)    |         |

Abbreviations: CI, confidence interval; PBQ, Postpartum Bonding Questionnaire; GAD-7, Generalized Anxiety Disorder Assessment; EPDS, Edinburgh Postnatal Depression Scale

**eTable 4. Subgroup analysis for the primary outcome**

| Characteristic                              | Subgroup                  | Music therapy |               | Standard care |              | Mean difference (95% CI) | p <sup>1</sup> |
|---------------------------------------------|---------------------------|---------------|---------------|---------------|--------------|--------------------------|----------------|
|                                             |                           | n             | M (SD)        | n             | M (SD)       |                          |                |
| a) Effects of music therapy during NICU     |                           |               |               |               |              |                          |                |
| Analysis scope                              | Intention-to-treat        | 99            | 7.45 (8.26)   | 93            | 6.79 (6.55)  | 0.66 (-1.46 to 2.77)     | 0.54           |
|                                             | Per-protocol <sup>2</sup> | 84            | 7.99 (8.68)   | 93            | 6.79 (6.55)  | 1.2 (-1.1 to 3.5)        | 0.30           |
| Sex                                         | Male                      | 51            | 8.17 (8.79)   | 45            | 6.39 (7.54)  | 1.79 (-1.52 to 5.1)      | 0.29           |
|                                             | Female                    | 48            | 6.68 (7.67)   | 48            | 7.17 (5.52)  | -0.49 (-3.2 to 2.22)     | 0.72           |
| Gestational age                             | < 28 weeks                | 21            | 6.73 (9.03)   | 14            | 9.94 (10.03) | -3.21 (-10.05 to 3.62)   | 0.34           |
|                                             | ≥ 28 to < 32 weeks        | 44            | 8.2 (8.73)    | 38            | 6.46 (6.18)  | 1.74 (-1.55 to 5.04)     | 0.30           |
|                                             | ≥ 32 weeks                | 34            | 6.91 (7.24)   | 41            | 6.02 (5.14)  | 0.9 (-2.06 to 3.85)      | 0.55           |
| Hearing status                              | Confirmed normal          | 65            | 8.95 (9.34)   | 61            | 7.31 (7.17)  | 1.64 (-1.29 to 4.57)     | 0.27           |
|                                             | Abnormal or not tested    | 34            | 4.58 (4.51)   | 32            | 5.81 (5.11)  | -1.23 (-3.6 to 1.15)     | 0.31           |
| Bonding                                     | Impaired <sup>3</sup>     | 3             | 16 (8)        | 4             | 20 (10.39)   | -4 (-21.91 to 13.91)     | 0.59           |
|                                             | Not impaired              | 96            | 7.18 (8.16)   | 89            | 6.2 (5.73)   | 0.98 (-1.05 to 3.02)     | 0.34           |
| Socioeconomic status <sup>4</sup>           | Lower                     | 13            | 5.69 (7.03)   | 13            | 9.92 (8.63)  | -4.23 (-10.61 to 2.15)   | 0.18           |
|                                             | Other                     | 84            | 7.79 (8.51)   | 79            | 6.28 (6.1)   | 1.51 (-0.77 to 3.79)     | 0.19           |
| Skin-to-skin care                           | ≥ 4 days/week             | 73            | 8.05 (8.83)   | 69            | 7.33 (6.97)  | 0.72 (-1.92 to 3.35)     | 0.59           |
|                                             | < 4 days/week             | 26            | 5.76 (6.23)   | 24            | 5.23 (4.95)  | 0.53 (-2.66 to 3.72)     | 0.74           |
| Breastfeeding                               | None                      | 28            | 6.18 (6.09)   | 22            | 8.01 (8.85)  | -1.83 (-6.32 to 2.65)    | 0.41           |
|                                             | < 3 months                | 20            | 6.22 (10.18)  | 17            | 6.13 (5.94)  | 0.09 (-5.41 to 5.58)     | 0.97           |
|                                             | ≥ 3 months                | 51            | 8.63 (8.44)   | 54            | 6.5 (5.65)   | 2.13 (-0.68 to 4.93)     | 0.14           |
| Emotional closeness during feeding          | Consistently              | 61            | 5.23 (6.28)   | 69            | 6.22 (6.33)  | -1 (-3.19 to 1.2)        | 0.37           |
|                                             | Sometimes                 | 21            | 11.05 (8.26)  | 17            | 8.25 (6.92)  | 2.8 (-2.2 to 7.8)        | 0.26           |
|                                             | Rarely                    | 11            | 13.88 (13.39) | 5             | 9.8 (9.01)   | 4.07 (-8.42 to 16.57)    | 0.49           |
| b) Effects of music therapy after discharge |                           |               |               |               |              |                          |                |
| Analysis scope                              | Intention-to-treat        | 99            | 7.3 (7.03)    | 91            | 6.92 (8.01)  | 0.38 (-1.78 to 2.55)     | 0.73           |

| Characteristic                     | Subgroup                  | Music therapy |              | Standard care |              | Mean difference (95% CI) | p <sup>1</sup> |
|------------------------------------|---------------------------|---------------|--------------|---------------|--------------|--------------------------|----------------|
|                                    |                           | n             | M (SD)       | n             | M (SD)       |                          |                |
| Sex                                | Per-protocol <sup>2</sup> | 63            | 7.9 (7.51)   | 91            | 6.92 (8.01)  | 0.99 (-1.51 to 3.49)     | 0.44           |
|                                    | Male                      | 47            | 7.26 (8)     | 49            | 7.4 (8.54)   | -0.14 (-3.49 to 3.21)    | 0.93           |
|                                    | Female                    | 52            | 7.33 (6.11)  | 42            | 6.35 (7.4)   | 0.98 (-1.85 to 3.81)     | 0.49           |
| Gestational age                    | < 28 weeks                | 20            | 7.16 (7.14)  | 15            | 9.15 (12.02) | -1.99 (-9.25 to 5.26)    | 0.57           |
|                                    | ≥ 28 to < 32 weeks        | 39            | 8.37 (8.21)  | 41            | 6.41 (7.22)  | 1.96 (-1.49 to 5.41)     | 0.26           |
|                                    | ≥ 32 weeks                | 40            | 6.32 (5.62)  | 35            | 6.54 (6.79)  | -0.23 (-3.12 to 2.67)    | 0.88           |
| Hearing status                     | Confirmed normal          | 65            | 7.95 (7.82)  | 59            | 8.37 (9.11)  | -0.42 (-3.45 to 2.62)    | 0.79           |
|                                    | Abnormal or not tested    | 34            | 6.05 (5.09)  | 32            | 4.24 (4.39)  | 1.81 (-0.52 to 4.15)     | 0.13           |
| Bonding                            | Impaired <sup>3</sup>     | 3             | 11.67 (5.86) | 7             | 17.29 (9.6)  | -5.62 (-17.57 to 6.33)   | 0.30           |
|                                    | Not impaired              | 98            | 7.21 (7.01)  | 85            | 6.09 (7.24)  | 1.12 (-0.97 to 3.21)     | 0.29           |
| Socioeconomic status <sup>4</sup>  | Lower                     | 13            | 7.85 (6.11)  | 13            | 7.77 (9.81)  | 0.08 (-6.61 to 6.76)     | 0.98           |
|                                    | Other                     | 83            | 7.29 (7.3)   | 78            | 6.77 (7.73)  | 0.52 (-1.83 to 2.86)     | 0.66           |
| Skin-to-skin care                  | ≥ 4 days/week             | 72            | 7.75 (7.52)  | 68            | 7.63 (8.54)  | 0.12 (-2.57 to 2.82)     | 0.93           |
|                                    | < 4 days/week             | 27            | 6.09 (5.46)  | 23            | 4.81 (5.81)  | 1.28 (-1.95 to 4.51)     | 0.43           |
| Breastfeeding                      | None                      | 27            | 8.01 (7.46)  | 22            | 5.82 (7.5)   | 2.19 (-2.14 to 6.52)     | 0.31           |
|                                    | < 3 months                | 19            | 4.75 (6.02)  | 18            | 7.68 (10.3)  | -2.94 (-8.67 to 2.79)    | 0.30           |
|                                    | ≥ 3 months                | 53            | 7.85 (7.06)  | 51            | 7.12 (7.41)  | 0.73 (-2.08 to 3.55)     | 0.61           |
| Emotional closeness during feeding | Consistently              | 67            | 6.18 (6.18)  | 63            | 5.3 (6.45)   | 0.89 (-1.31 to 3.08)     | 0.43           |
|                                    | Sometimes                 | 20            | 10.11 (8.87) | 17            | 9.29 (6.6)   | 0.82 (-4.36 to 6)        | 0.75           |
|                                    | Rarely                    | 8             | 10.5 (7.52)  | 8             | 14.7 (15.62) | -4.2 (-17.85 to 9.44)    | 0.51           |

<sup>1</sup> All overall tests of subgroup effects were non-significant (not shown).

<sup>2</sup> Per-protocol analysis was defined as including those who received at least 6 MT sessions in the NICU and at least 5 MT sessions post-discharge, respectively.

<sup>3</sup> Impaired bonding was defined as a baseline PBQ impaired bonding score >11; for the post-discharge analysis, this pre-planned cutoff was replaced by ≥ 10 because there were otherwise too few cases to analyze.

<sup>4</sup> Proxy for parental socioeconomic status, where "lower" is defined as cases with a single mother or where any parent had not completed secondary school.

**eFigure 1. Risk for rehospitalization**

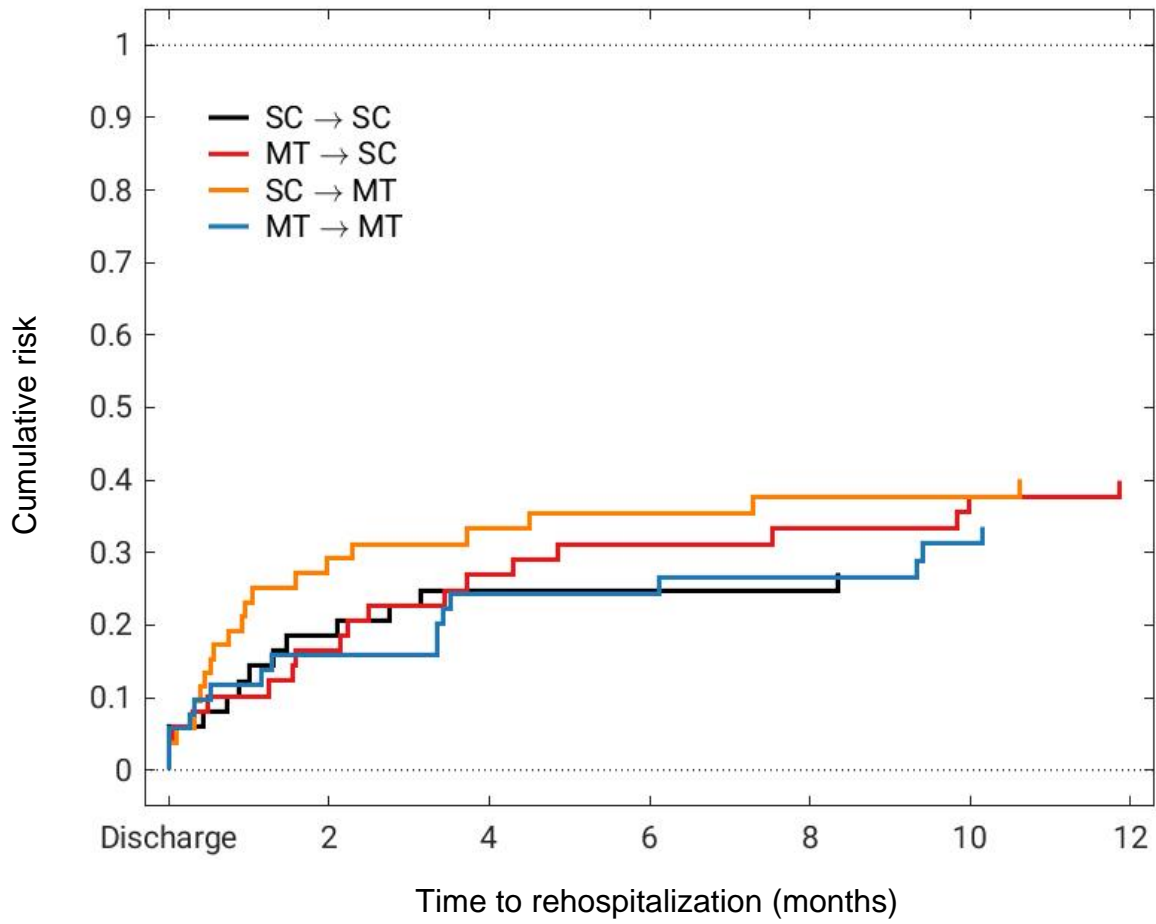

**eTable 5. Severe adverse events**

| <b>Country</b> | <b>Timing of event</b>          | <b>Nature of event</b> | <b>Likelihood of being related to study procedures</b> |
|----------------|---------------------------------|------------------------|--------------------------------------------------------|
| Argentina      | During NICU stay                | Infant death           | Unrelated<br>(did not receive MT in NICU)              |
| Poland         | During NICU stay                | Infant death           | Unrelated<br>(did not receive MT in NICU)              |
| Norway         | Shortly after discharge to home | Infant death           | Unrelated<br>(did not receive MT in NICU)              |
| Colombia       | Shortly after discharge to home | Infant death           | Unlikely<br>(under SC at time of death)                |



## eAppendix. Description of primary outcome variable

The Postpartum Bonding Questionnaire (PBQ) evaluates mothers' feelings, experiences and attitudes toward their infant, using a 25-item self-report screening tool.<sup>1,2</sup> The PBQ is comprised of 4 factors, each with its own cut-off point: 1) general impaired bonding (12 items), 2) rejection and pathological anger (7 items), 3) anxiety about the infant (4 items), and 4) incipient abuse (2 items). Each item is rated on a 6-point Likert scale (each 0-5) with anchors "always" and "never," with total scores ranging from 0-125 and higher scores indicating impaired bonding.

PBQ pre-specified subgroups for exploratory analyses: 1) sex; GA at birth (<28 weeks, 28 to <32 weeks, 32 to <35 weeks); 2) hearing status measured at discharge (normal vs. abnormal); 3) PBQ factor 1 impaired bonding score at baseline (>11 vs. ≤11); 4) proxy for parental socioeconomic status (education level, marital status); 5) average parental skin-to-skin care during NICU (4 or more days per week vs. fewer than 4 days per week); duration of breastfeeding prior to 6-month CA (none, fewer than 3 months, 3 months or greater); perceived emotional closeness during breastfeeding (consistently, sometimes, rarely); and treatment per protocol (≥6 NICU MT sessions; ≥5 post-discharge MT sessions).<sup>3</sup>

## References

- 1 Brockington IF, Oates J, George S, et al. A screening questionnaire for mother-infant bonding disorders. *Arch Womens Ment Health*. 2001;3(4):133-40.
- 2 Brockington IF, Fraser C, Wilson D. The Postpartum Bonding Questionnaire: a validation. *Arch Womens Ment Health*. 2006;9:233-42. doi:10.1007/s00737-006-0132-1
- 3 Ghetti C, Bieleninik L, Hysing M, et al. Longitudinal Study of music Therapy's Effectiveness for Premature infants and their caregivers (LongSTEP): protocol for an international randomised trial. *BMJ Open*. 2019;9:1-16. doi:10.1136/bmjopen-2018-025062
