# Supplementary material for: Effect of Music Therapy on Parent-Infant Bonding Among Infants Born Preterm: A Randomized Clinical Trial
Source: PubMed Central journal article supplement (PMC10220519; doi:10.1001/jamanetworkopen.2023.15750), 2023-05-26
Supplement: jamanetwopen-e2315750-s003.pdf [file jamanetwopen-e2315750-s003.pdf]

## Data Sharing Statement

Ghetti. Effect of Music Therapy on Parent-Infant Bonding Among Infants Born Preterm: A Randomized Clinical Trial. *JAMA Netw Open*. Published May 26, 2023.  
doi:10.1001/jamanetworkopen.2023.15750

### Data

**Data available:** Yes

**Data types:** Deidentified participant data, Data dictionary

**How to access data:** Available through OSF through the following URL:

<https://doi.org/10.17605/osf.io/smjka>

**When available:** With publication

### Supporting Documents

**Document types:** Statistical/analytic code

**How to access documents:** Available via OSF through URL:

<https://doi.org/10.17605/osf.io/smjka>

**When available:** With publication

### Additional Information

**Who can access the data:** Anyone requesting the data

**Types of analyses:** For any purpose

**Mechanisms of data availability:** Without investigator support
